# Supplementary material
Source: PubMed Central journal article supplement (PMC4675124)
Supplement: JSLHR-58-360-s001.pdf [file JSLHR-58-360-s001.pdf]

**Supplemental Table 1.** Mean, standard deviation (in parentheses), and range of participant characteristics and assessments.

|                                            | <b>LE group<br/>(n = 16)</b> | <b>SLI group<br/>(n = 20)</b> | <b>AE group<br/>(n = 23)</b> | <b>Group<br/>differences</b>           |
|--------------------------------------------|------------------------------|-------------------------------|------------------------------|----------------------------------------|
| Age                                        | 3;7<br>(0;2)<br>3;2–3;11     | 5;5<br>(0;3)<br>4;11–6;1      | 5;5<br>(0;3)<br>5;0–5;11     |                                        |
| <sup>c</sup> CMMS                          | 104.3<br>(11.8)<br>81–122    | 95.2<br>(6.2)<br>86–106       | 106.9<br>(12)<br>86–128      | LE vs SLI**<br>SLI vs AE**<br>LE vs AE |
| <sup>d</sup> PPVT-R<br>RAW                 | 41.6<br>(9.3)<br>30–60       | 44.4<br>(11.8)<br>20–62       | 66.1<br>(11.1)<br>46–86      | LE vs SLI<br>SLI vs AE**<br>LE vs AE** |
| <sup>e</sup> PPVT-R<br>STD                 | 105.3<br>(9.9)<br>85–121     | 82.2<br>(12.9)<br>62–99       | 103.6<br>(10.7)<br>87–122    | LE vs SLI**<br>SLI vs AE**<br>LE vs AE |
| <sup>f</sup> TOLD-P2                       | <sup>a</sup> not applicable  | 80.2<br>(8.3)<br>56–90        | 100.7<br>(9.3)<br>88–124     | SLI vs AE**                            |
| <sup>g</sup> TOLD-P2<br>Syntax<br>Quotient | <sup>a</sup> not applicable  | 76.3<br>(7.6)<br>–57–85       | 99.23<br>(9.4)<br>–85–117    | SLI vs AE**                            |
| <sup>h</sup> TELD                          | 106.8<br>(10.4)<br>93 - 129  | <sup>b</sup> not applicable   | <sup>b</sup> not applicable  | <sup>b</sup> not applicable            |
| <sup>i</sup> MLUm                          | 4.67<br>(0.58)<br>3.44–5.91  | 4.45<br>(0.71)<br>3.12–5.95   | 5.59<br>(0.72)<br>4.36–6.94  | LE vs SLI<br>SLI vs AE**<br>LE vs AE** |
| <sup>j</sup> TEGI<br>Screener              | 69.1<br>(19.87)<br>36–97     | 54.6<br>(34.2)<br>0–91        | 87.8<br>(11.7)<br>58–100     | LE vs SLI<br>SLI vs AE**<br>LE vs AE** |

\*\*  $p < .01$ .

<sup>a</sup>Children in the LE group were not administered the TOLD-P2

<sup>b</sup>Children in the SLI and AE groups were not administered the TELD

<sup>c</sup>Columbia Mental Maturity Scale, Standard Score

<sup>d</sup>Peabody Picture Vocabulary Test-Revised, Raw Score

<sup>e</sup>Peabody Picture Vocabulary Test-Revised, Standard Score

<sup>f</sup>Test of Language Development–Primary, Language Quotient Standard Score

<sup>g</sup>Test of Language Development–Primary, Syntax Quotient Standard Score

<sup>h</sup>Test of Early Language Development, Spoken Language Standard Score

<sup>i</sup>Mean Length of Utterance in morphemes

<sup>j</sup>Test of Early Grammatical Impairment Screening Test Standard Score
