# Supplementary material
Source: PubMed Central journal article supplement (PMC4675124)
Supplement: JSLHR-58-360-s002.pdf [file JSLHR-58-360-s002.pdf]

**Supplemental Table 2.** *Frequency of verb occurrence (combined stem and inflected form) in the Hall, Nagy, & Linn (1984) corpora.*

| Familiar verb<br>( <i>n</i> = 28) | Child<br>productions | Caregiver<br>input | Unfamiliar verb<br>( <i>n</i> = 28) | Child<br>productions | Caregiver<br>input |
|-----------------------------------|----------------------|--------------------|-------------------------------------|----------------------|--------------------|
| <b>bites</b>                      | 62                   | 48                 | <b>gnaws</b>                        | 0                    | 0                  |
| <b>carries</b>                    | 23                   | 50                 | <b>transports</b>                   | 0                    | *2                 |
| <b>cleans</b>                     | 82                   | 130                | <b>scours</b>                       | 0                    | 0                  |
| <b>climbs</b>                     | 38                   | 25                 | <b>scales</b>                       | 0                    | 0                  |
| <b>cooks</b>                      | 20                   | 58                 | <b>broils</b>                       | 0                    | 0                  |
| <b>cries</b>                      | 19                   | 31                 | <b>wails</b>                        | 0                    | 0                  |
| <b>draws</b>                      | 52                   | 57                 | <b>drafts</b>                       | 0                    | 0                  |
| <b>drinks</b>                     | 135                  | 208                | <b>swigs</b>                        | 0                    | 0                  |
| <b>dumps</b>                      | 7                    | 3                  | <b>scraps</b>                       | 0                    | 0                  |
| <b>feeds</b>                      | 24                   | 50                 | <b>fuels</b>                        | 0                    | 0                  |
| <b>gets</b>                       | 1859                 | 2522               | <b>gains</b>                        | 0                    | 0                  |
| <b>hides</b>                      | 56                   | 26                 | <b>stows</b>                        | 0                    | 0                  |
| <b>holds</b>                      | 208                  | 251                | <b>grips</b>                        | 0                    | 0                  |
| <b>kicks</b>                      | 59                   | 14                 | <b>punts</b>                        | 0                    | 0                  |
| <b>looks</b>                      | 1548                 | 1202               | <b>gapes</b>                        | 0                    | 0                  |
| <b>moves</b>                      | 155                  | 215                | <b>shifts</b>                       | 0                    | *3                 |
| <b>picks</b>                      | 163                  | 243                | <b>plucks</b>                       | 0                    | 0                  |
| <b>plays</b>                      | 491                  | 461                | <b>romps</b>                        | 0                    | 0                  |
| <b>pulls</b>                      | 83                   | 108                | <b>lugs</b>                         | 0                    | 0                  |
| <b>pushes</b>                     | 76                   | 82                 | <b>nudges</b>                       | 0                    | 0                  |
| <b>rides</b>                      | 36                   | 33                 | <b>guides</b>                       | 0                    | *2                 |

---

|               |      |      |               |   |     |
|---------------|------|------|---------------|---|-----|
| <b>rips</b>   | 4    | 5    | <b>shreds</b> | 0 | 0   |
| <b>runs</b>   | 120  | 126  | <b>scoots</b> | 0 | 0   |
| <b>sees</b>   | 1855 | 2077 | <b>views</b>  | 0 | *5  |
| <b>sings</b>  | 88   | 119  | <b>croons</b> | 0 | 0   |
| <b>sneaks</b> | 7    | 6    | <b>slinks</b> | 0 | 0   |
| <b>talks</b>  | 274  | 302  | <b>gabs</b>   | 0 | *14 |
| <b>throws</b> | 155  | 142  | <b>slings</b> | 0 | 0   |

---

\*All of these verbs appeared only in their uninflected forms in the Adult speech, never in their inflected forms.
