# Supplementary material
Source: PubMed Central journal article supplement (PMC4675124)
Supplement: JSLHR-58-360-s003.pdf [file JSLHR-58-360-s003.pdf]

**Supplemental Table 3.** *Verb pairs in their sentence frames.*

Training Stimuli

- 1p. The car is blue.
- 2p. I have a big bunny.
- 3p. Her sister is walking to school.
- 4p. The kids like to write.
- 5p. Yesterday he cooked dinner.
- 6p. The dogs run around outside.
- 7p. Their mom is nice.
- 8p. You play on the swings at school.

Test Stimuli

1. The girl *bites/gnaws* into the cookie.
2. The man *carries/transport*s the box.
3. The boy *cleans/scours* the kitchen.
4. The woman *climbs/scales* the ladder.
5. The girl *cooks/broils* the chicken.
6. The girl *cries/wails* for her mom.
7. The girl *draws/drafts* on the sidewalk.
8. The boy *drinks/swigs* the milk.
9. The man *dumps/scraps* the idea.
10. The girl *feeds/fuels* the fire.
11. The boy *gets/gains* a sticker.
12. The girl *hides/stows* her doll.
13. The woman *holds/grips* the phone.
14. The boy *kicks/punts* the ball.
15. The man *looks/gapes* at the TV.
16. The woman *moves/shifts* to the couch.
17. The woman *picks/plucks* the flowers.
18. The girl *plays/romps* in the yard.
19. The girl *pulls/lugs* the wagon.
20. The boy *pushes/nudges* the swing.
21. The man *rides/guides* the bicycle.
22. The girl *rips/shreds* the paper.
23. The boy *runs/scoots* down the street.
24. The boy *sees/views* his brother.
25. The man *sings/croons* on stage.
26. The girl *sneaks/slinks* through the bushes.
27. The girl *talks/gabs* with her friend.
28. The boy *throws/slings* the rocks.
